# Supplementary material for: FZD10 Carried by Exosomes Sustains Cancer Cell Proliferation
Source: MDPI journal article supplement (doi:10.3390/cells8080777), 2019-07-25
Supplement: s1 [file s1]

# FZD10 Carried by Exosomes Sustains Cancer Cell Proliferation

**Maria Principia Scavo** <sup>1,\*</sup>, **Nicoletta Depalo** <sup>2</sup>, **Federica Rizzi** <sup>2</sup>, **Chiara Ingrosso** <sup>2</sup>, **Elisabetta Fanizza** <sup>2,3</sup>, **Annarita Chieti** <sup>1</sup>, **Caterina Messa** <sup>4</sup>, **Nunzio Denora** <sup>2,5</sup>, **Valentino Laquintana** <sup>5</sup>, **Marinella Striccoli** <sup>2</sup>, **Maria Lucia Curri** <sup>2,3</sup> and **Gianluigi Giannelli** <sup>1,6,\*</sup>

<sup>1</sup> Personalized Medicine Laboratory, National Institute of Gastroenterology "S. De Bellis", Via Turi 27, Castellana Grotte, 70013 Bari, Italy

<sup>2</sup> Institute for Chemical and Physical Processes (IPCF)-CNR SS Bari, Via Orabona 4, 70126 Bari, Italy

<sup>3</sup> Dipartimento di Chimica, Università degli Studi di Bari Aldo Moro, Via Orabona 4, 70126 Bari, Italy

<sup>4</sup> Laboratory of Clinical Biochemistry, National Institute of Gastroenterology "S. De Bellis", Via Turi 27, Castellana Grotte, 70013 Bari, Italy

<sup>5</sup> Dipartimento di Farmacia, Scienze del Farmaco, Università degli Studi di Bari Aldo Moro, Via Orabona 4, 70126 Bari, Italy

<sup>6</sup> National Institute of Gastroenterology "S. De Bellis", Scientific Direction, Via Turi 27, Castellana Grotte 70013 Bari, Italy

\* Correspondence: maria.scavo@irccsdebellis.it (M.P.S.); gianluigi.giannelli@irccsdebellis.it (G.G.); Tel.: +39-080-4994697 (M.P.S.)

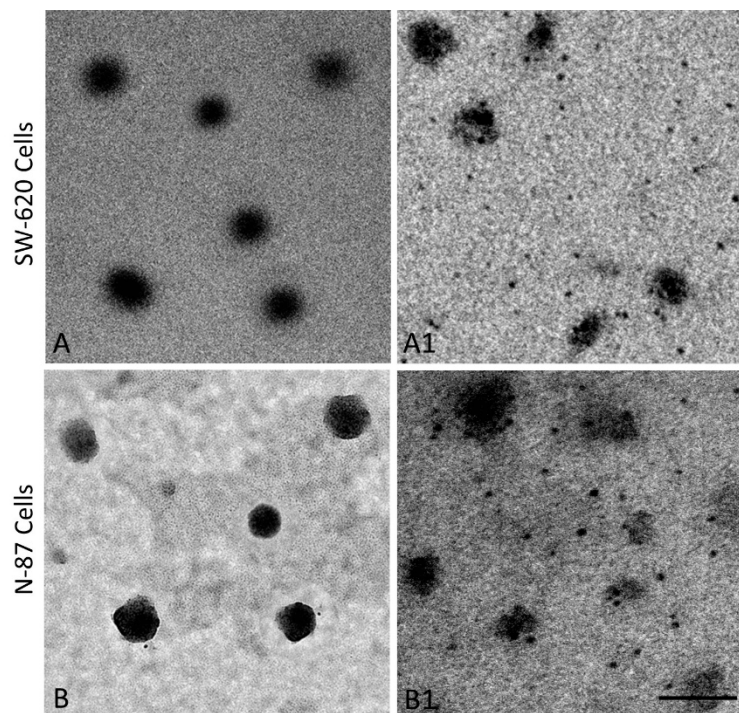

**Figure S 1.** Representative TEM micrographs obtained with positive staining of exosomes freshly extracted from culture medium of SW-620 (A) and N-87 (B) cells and of as synthesized Au NPs after treatment with FZD10 antibody for 16 hours, with BSA for 1 hour and then with exosomes extracted from SW-620 (A1) or N-87 (B1) cells for 15 minutes. Scale bar 100 nm.

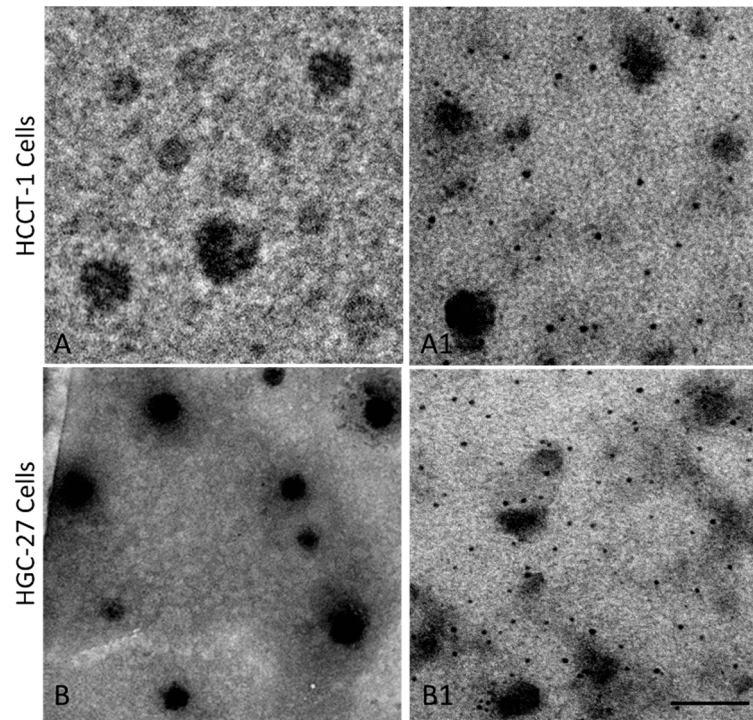

**Figure S 2** Representative TEM micrographs obtained with positive staining of exosomes freshly extracted from culture medium of HCCT-1 (A) and HGC-27 (B) cells and of as synthesized Au NPs after treatment with FZD10 antibody for 16 hours, with BSA for 1 hour and then with exosomes extracted from HCCT-1 (A1) or HGC-27 (B1) cells for 15 minutes. Scale bar 100 nm.
